# Supplementary material for: Injectablein situforming hydrogel gene depot to improve the therapeutic effect of STAT3 shRNA
Source: Royal Society of Chemistry journal article supplement (doi:10.1039/d1bm00624j), 2021-01-01
Supplement: d1bm00624j1.pdf [file d1bm00624j1.pdf]

## Supporting Information

### Injectable *in situ* forming hydrogel gene depot to improve the therapeutic effect of STAT3 shRNA

Da Yeon Kim, Hyeon Jin Ju, Jae Ho Kim, Sangdun Choi, Moon Suk Kim\*

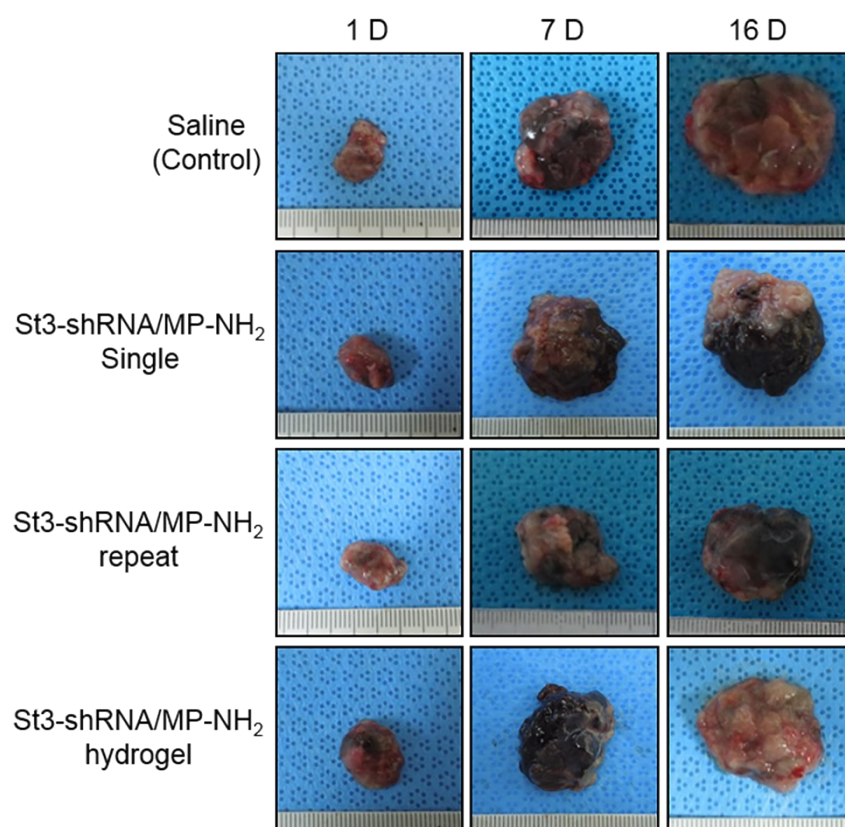

**Figure S1.** Images of excised tumor masses of tumors on days 1, 7, and 16 after intratumoral injection of xenograft-bearing mice with saline, St3-shRNA/MP-NH<sub>2</sub> complexes (single and repeat), and St3-shRNA/MP-NH<sub>2</sub> complex-loaded hydrogel (single).

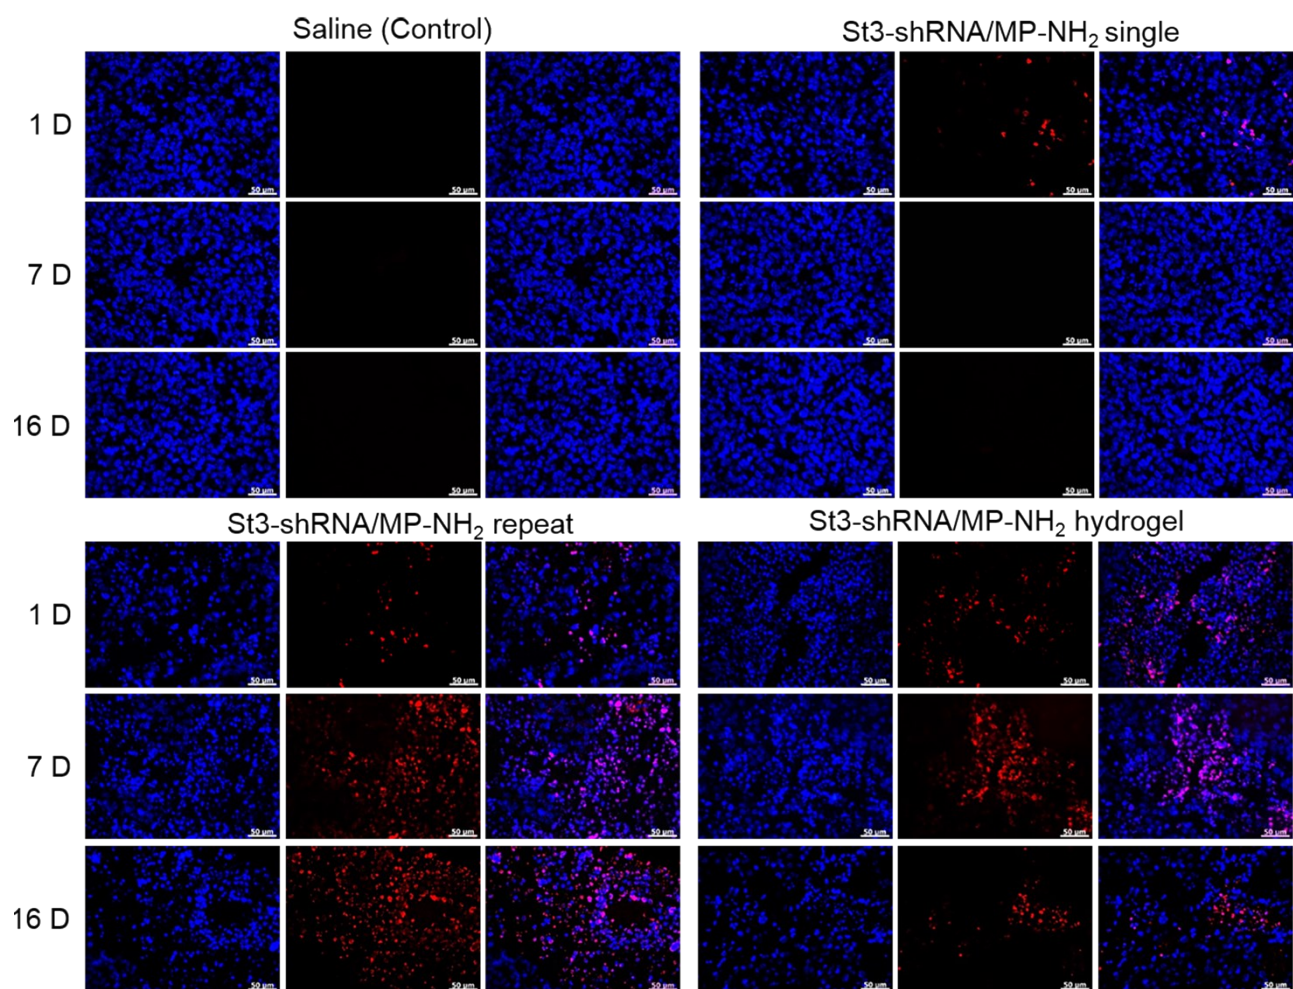

**Figure S2.** (First column) DAPI staining (blue: nuclei), (second column) TUNEL staining (red: apoptotic cells) and (third column) merged images of tumors on day 1, 7 and 16 after intratumoral injection of xenograft-bearing mice with saline, St3-shRNA/MP-NH<sub>2</sub> complexes (single and repeat), and St3-shRNA/MP-NH<sub>2</sub> complex-loaded hydrogel (single) (scale bar = 50 μm).
